# Supplementary material for: Regional differences in health further explained
Source: Springer Nature journal article supplement (doi:10.1007/s12508-022-00368-5), 2022-11-02
Supplement: MOESM1 [file 23669984]

## Appendix

**Table A1. Categories, codes, and sources for dependent and independent variables.**

| Variable                                                   | Category                         | Code | Sources                | Variable                       | Category                                            | Code                               | Source        |
|------------------------------------------------------------|----------------------------------|------|------------------------|--------------------------------|-----------------------------------------------------|------------------------------------|---------------|
| <b>Gender</b> <sup>§</sup>                                 | Male                             | 0    | Statistics Netherlands | <b>Physical activity*</b>      | Insufficient                                        | 1                                  | Health Survey |
|                                                            | Female                           | 1    | Statistics Netherlands |                                | Sufficient                                          | 0                                  | Health Survey |
| <b>Migration background</b> <sup>§</sup>                   | Dutch-born                       | 0    | Statistics Netherlands | <b>BMI*</b>                    | Underweight (<18.5)                                 | 1                                  | Health Survey |
|                                                            | Western migration background     | 1    | Statistics Netherlands |                                | Normal (18.5-25)                                    | 0                                  | Health Survey |
|                                                            | Non-western migration background | 2    | Statistics Netherlands |                                | Overweight (25-30)                                  | 2                                  | Health Survey |
| <b>Marital status</b> <sup>*</sup>                         | Married/living together          | 0    | Health Survey          | <b>Alcohol consumption*</b>    | Obese (30>)                                         | 3                                  | Health Survey |
|                                                            | Never married                    | 1    | Health Survey          |                                | Never                                               | 0                                  | Health Survey |
|                                                            | Widowed                          | 2    | Health Survey          |                                | Moderate                                            | 1                                  | Health Survey |
|                                                            | Divorced                         | 3    | Health Survey          |                                | Excessive                                           | 2                                  | Health Survey |
| <b>Highest attained level of education</b> <sup>*</sup>    | Primary school                   | 3    | Health Survey          | <b>Smoking*</b>                | Never smoked                                        | 0                                  | Health Survey |
|                                                            | Lower vocational education       | 2    | Health Survey          |                                | Former smoker                                       | 1                                  | Health Survey |
|                                                            | Middle vocational/secondary      | 1    | Health Survey          |                                | Current smoker                                      | 2                                  | Health Survey |
|                                                            | Higher vocational/university     | 0    | Health Survey          |                                |                                                     |                                    |               |
| <b>Standardized household income quartile</b> <sup>§</sup> | 0-25%                            | 3    | Statistics Netherlands | <b>Loneliness*</b>             | Continuous score 0-11 <sup>1</sup>                  | N/a                                | Health Survey |
|                                                            | 26-50%                           | 2    | Statistics Netherlands |                                | <b>Mastery*</b>                                     | Continuous score 7-35 <sup>2</sup> | n/a           |
|                                                            | 51-75%                           | 1    | Statistics Netherlands | <b>Chronic disease*</b>        | None                                                | 0                                  | Health Survey |
|                                                            | 76-100%                          | 0    | Statistics Netherlands |                                | At least one                                        | 1                                  | Health Survey |
| <b>Self-perceived income inadequacy</b> <sup>*</sup>       | Inadequate, major concerns       | 3    | Health Survey          | <b>Self-rated health*</b>      | Very (good)                                         | 0                                  | Health Survey |
|                                                            | Inadequate, some concerns        | 2    | Health Survey          |                                | Fair, (very) poor                                   | 1                                  | Health Survey |
|                                                            |                                  |      |                        | <b>Psychological distress*</b> | No, low or moderate risk (score 10-29) <sup>2</sup> | 0                                  | Health Survey |
|                                                            | Adequate, minor concerns         | 1    | Health Survey          |                                | High (score 30-50) <sup>2</sup>                     | 1                                  | Health Survey |
|                                                            | Adequate, no concerns            | 0    | Health Survey          |                                |                                                     |                                    |               |

BMI: body mass index. §Registry data \*Self-reported data (Health Survey). <sup>1</sup> The variables loneliness and mastery are continuous variables. The 11 statements for loneliness (table A2) are answered “yes”, “more or less” or “no” and result in a score between 0 and 11. Respondents scoring 0,1 or 2 are considered not lonely, respondents scoring between 3 up until 8 are somewhat lonely, respondents scoring 9 or 10 are severely lonely and respondents scoring 11 are very severely lonely. The 7 statements for mastery are answered on a 5-point Likert scale (totally agree [lowest score 1], agree, neither agree or disagree, disagree or totally disagree [highest score 5]). This results to a score between 7 and 35, a score of 19 or lower is considered as insufficient mastery. <sup>2</sup> The variable risk for psychological distress is based on the Kessler-10 questionnaire. The 10 questions (table A2) are answered on a 5-point Likert scale (all the time, most of the time, some of the time, a little of the time, and none of the time). The K10 score varies between 10 (no risk) and maximum 50 (high risk).

---

**Table A2. Statements/questions for the variables loneliness, mastery and psychological distress.**

---

**Loneliness (De Jong-Gierveld 1985)<sup>1</sup>**

1. There is always someone I can talk to about my day-to-day problems.
2. I miss having a really close friend.
3. I experience a general sense of emptiness.
4. There are plenty of people I can lean on when I have problems.
5. I miss the pleasure of the company of others.
6. I find my circle of friends and acquaintances too limited.
7. There are many people I can trust completely.
8. There are enough people I feel close to.
9. I miss having people around me.
10. I often feel rejected.

**Mastery (Pearlin & Schooler 1978)<sup>2</sup>**

1. I have little control over the things that happen to me.
2. No way I can solve some of the problems I have.
3. There is little I can do to change many of the important things of life.
4. I often feel helpless in dealing with the problems of life.
5. Sometimes I feel that I am being pushed around in life.
6. What happens in the future mostly depends on me.
7. I can do just about anything I really set my mind to.

**Psychological distress (Kessler 2002) [K10]<sup>3</sup>**

In the past 4 weeks...

1. About how often did you feel tired out for no good reason?
2. About how often did you feel nervous?
3. About how often did you feel so nervous that nothing could calm you down?
4. About how often did you feel hopeless?
5. About how often did you feel restless or fidgety?
6. About how often did you feel so restless you could not sit still?
7. About how often did you feel depressed?
8. About how often did you feel that everything was an effort?
9. About how often did you feel so sad that nothing could cheer you up?
10. About how often did you feel worthless?

---

<sup>1</sup> The 11 statements by De Jong-Gierveld are answered “yes”, “more or less” or “no”. <sup>2</sup> The 7 statements by Pearlin & Schooler are answered on a 5-point Likert scale (totally agree, agree, neither agree or disagree, disagree or totally disagree). <sup>3</sup> The K10 questions are answered on a 5-point Likert scale (all the time, most of the time, some of the time, a little of the time, and none of the time).

**Table A3. Missing data (n=457,150)**

| <b>Variable</b>                                           | <b>N</b> | <b>(%)</b> |
|-----------------------------------------------------------|----------|------------|
| <b>Region*</b>                                            | 0        | (0)        |
| <b>Age<sup>§</sup></b>                                    | 0        | (0)        |
| <b>Gender<sup>§</sup></b>                                 | 0        | (0)        |
| <b>Migration background<sup>§</sup></b>                   | 0        | (0)        |
| <b>Marital state*</b>                                     | 11,192   | (2.4)      |
| <b>Highest attained level of education *</b>              | 31,422   | (6.9)      |
| <b>Standardized household income quartile<sup>§</sup></b> | 737      | (0.2)      |
| <b>Income inadequacy*</b>                                 | 35,643   | (7.8)      |
| <b>Physical activity*</b>                                 | 33,488   | (7.3)      |
| <b>BMI*</b>                                               | 21,261   | (4.7)      |
| <b>Alcohol consumption*</b>                               | 36,967   | (8.1)      |
| <b>Smoking*</b>                                           | 32,605   | (7.1)      |
| <b>Chronic disease*</b>                                   | 8,808    | (1.9)      |
| <b>Self-rated health*</b>                                 | 5,730    | (1.3)      |
| <b>Psychological distress*</b>                            | 20,103   | (4.4)      |
| <b>Loneliness*</b>                                        | 36,364   | (8.0)      |
| <b>Mastery*</b>                                           | 36,612   | (8.0)      |

BMI: body mass index. §Registry data \*Self-rated data (Health Survey).

**Table A4. Descriptive weighted data**

| <b>Variable</b>                                            | <b>Category</b>                                      | <b>%</b> |
|------------------------------------------------------------|------------------------------------------------------|----------|
| <b>Gender</b> <sup>§</sup>                                 | Male                                                 | 50.9     |
| <b>Migration background</b> <sup>§</sup>                   | Dutch-born                                           | 78.8     |
|                                                            | Western migration background                         | 4.9      |
| <b>Marital status</b> *                                    | Married/living together                              | 66.1     |
|                                                            | Never married                                        | 20.3     |
|                                                            | Widowed                                              | 7.4      |
| <b>Highest attained level of education</b> *               | Primary school                                       | 6.2      |
|                                                            | Lower vocational education                           | 24.4     |
|                                                            | Middle vocational/secondary                          | 35.0     |
| <b>Standardized household income quartile</b> <sup>§</sup> | 0-25%                                                | 18.7     |
|                                                            | 26-50%                                               | 23.7     |
|                                                            | 51-75%                                               | 27.4     |
| <b>Self perceived income inadequacy</b> *                  | Inadequate, major concerns                           | 4.7      |
|                                                            | Inadequate, some concerns                            | 13.5     |
|                                                            | Adequate, minor concerns                             | 35.2     |
| <b>Physical activity</b> *                                 | Insufficient                                         | 34.7     |
| <b>Body Mass Index</b> *                                   | Normal (18,5-25)                                     | 49.4     |
|                                                            | Overweight (25-30)                                   | 35.1     |
|                                                            | Obese (30>)                                          | 13.8     |
| <b>Alcohol consumption</b> *                               | Never                                                | 24.4     |
|                                                            | Moderate                                             | 75.6     |
| <b>Smoking</b> *                                           | Never smoked                                         | 45.8     |
|                                                            | Former smoker                                        | 33.3     |
| <b>Loneliness</b> *                                        | Somewhat or (very) severely (scores >2) <sup>1</sup> | 42.8     |
| <b>Mastery</b> *                                           | Insufficient (score <20) <sup>2</sup>                | 9.9      |
| <b>Chronic disease</b> *                                   | None                                                 | 66.0     |
| <b>Self-rated health</b> *                                 | Very (good)                                          | 75.6     |
| <b>Psychological distress</b> *                            | No, low or moderate risk                             | 93.5     |

BMI: body mass index. §Registry data \*Self-rated data (Health Survey). <sup>1</sup>The variables loneliness and mastery are continuous variables. The 11 statements to determine degree of loneliness (table A2) are answered “yes”, “more or less” or “no” and result in a score between 0 and 11. Respondents scoring 0,1 or 2 are considered not lonely, respondents scoring between 3 and 8 are somewhat lonely, respondents scoring 9 or 10 are severely lonely and respondents scoring 11 are very severely lonely. The 7 statements for mastery are answered on a 5-point Likert scale (totally agree [lowest score 1], agree, neither agree or disagree, disagree or totally disagree [highest score 5]). This results to a score between 7 and 35, a score of 19 or lower is considered as insufficient mastery. <sup>2</sup>The variable risk for psychological distress is based on the Kessler-10 questionnaire. The 10 questions (table A2) are answered on a 5-point Likert scale (all the time, most of the time, some of the time, a little of the time, and none of the time). The K10 score varies between 10 (no risk) and maximum 50 (high risk).

**Table A5. Percentages per region (n = 334,721)**

|                           | <u>BMI</u>  |       | <u>Alcohol-consumption</u> | <u>Smoking</u> |        | <u>Physical activity</u> | <u>Loneliness</u>                      | <u>Mastery</u>             | <u>Self-rated health</u> | <u>Chronic disease</u> | <u>Psychological distress</u> |
|---------------------------|-------------|-------|----------------------------|----------------|--------|--------------------------|----------------------------------------|----------------------------|--------------------------|------------------------|-------------------------------|
|                           | Over-weight | Obese | Excessive                  | Former smoker  | Smoker | In-sufficient            | Somewhat or (very) severe <sup>1</sup> | In-sufficient <sup>2</sup> | Fair or (very) poor      | At least one           | High risk                     |
| Zuid-Limburg              | 35,4        | 16,3  | 7,4                        | 33,7           | 22,3   | 40,6                     | 46,6                                   | 11,4                       | 28,0                     | 37,1                   | 7,1                           |
| Zuid-Holland-Zuid         | 36,3        | 15,1  | 5,3                        | 32,4           | 21,1   | 38,0                     | 41,2                                   | 9,5                        | 21,1                     | 30,6                   | 4,9                           |
| Zeeland                   | 36,5        | 13,7  | 6,2                        | 35,5           | 17,5   | 29,9                     | 45,5                                   | 10,0                       | 25,6                     | 32,7                   | 5,2                           |
| Zaanstreek-Waterland      | 36,1        | 14,7  | 7,3                        | 34,0           | 21,5   | 34,0                     | 39,8                                   | 9,4                        | 23,0                     | 35,1                   | 5,8                           |
| West-Brabant              | 36,1        | 13,5  | 6,5                        | 35,1           | 17,8   | 34,8                     | 42,1                                   | 9,3                        | 24,6                     | 30,1                   | 5,5                           |
| Utrecht                   | 31,2        | 11,6  | 7,6                        | 31,4           | 19,6   | 33,3                     | 39,5                                   | 7,9                        | 20,3                     | 30,6                   | 5,0                           |
| Twente                    | 37,4        | 14,0  | 8,1                        | 33,1           | 20,5   | 29,2                     | 39,3                                   | 8,1                        | 21,1                     | 33,4                   | 7,0                           |
| Rotterdam                 | 35,4        | 15,6  | 6,3                        | 29,7           | 24,0   | 39,7                     | 45,6                                   | 10,6                       | 26,0                     | 35,0                   | 7,7                           |
| Noord- en Oost-Gelderland | 37,7        | 13,8  | 6,7                        | 36,3           | 18,5   | 31,0                     | 36,7                                   | 8,5                        | 20,5                     | 35,5                   | 5,3                           |
| Limburg-Noord             | 37,1        | 13,7  | 6,5                        | 37,5           | 18,6   | 33,7                     | 43,6                                   | 8,9                        | 24,1                     | 34,4                   | 4,8                           |
| Kennemerland              | 34,4        | 12,3  | 8,0                        | 35,3           | 19,3   | 31,6                     | 39,6                                   | 7,7                        | 19,9                     | 31,3                   | 4,9                           |
| IJsselland                | 35,5        | 12,5  | 7,2                        | 35,5           | 20,1   | 31,3                     | 37,8                                   | 8,2                        | 20,1                     | 33,9                   | 5,3                           |
| Hollands Noorden          | 34,9        | 12,9  | 7,8                        | 36,2           | 19,6   | 30,8                     | 39,7                                   | 8,3                        | 21,7                     | 32,4                   | 5,1                           |
| Hollands Midden           | 35,4        | 12,9  | 7,7                        | 33,3           | 18,5   | 31,5                     | 40,1                                   | 9,4                        | 20,0                     | 34,8                   | 6,0                           |
| Hart voor Brabant         | 35,4        | 13,6  | 7,7                        | 34,8           | 19,0   | 33,0                     | 40,0                                   | 8,9                        | 23,4                     | 31,1                   | 5,6                           |
| Haaglanden                | 33,9        | 13,7  | 6,7                        | 28,2           | 21,3   | 34,5                     | 46,6                                   | 10,9                       | 24,7                     | 36,2                   | 8,9                           |
| Groningen                 | 34,9        | 13,9  | 8,0                        | 32,1           | 24,4   | 33,8                     | 41,5                                   | 8,0                        | 21,9                     | 35,5                   | 4,8                           |
| Gooi en Vechtstreek       | 32,9        | 9,9   | 8,6                        | 37,5           | 17,8   | 37,5                     | 37,5                                   | 7,9                        | 21,1                     | 31,6                   | 5,2                           |
| Gelderland-Zuid           | 34,3        | 12,8  | 7,0                        | 31,3           | 21,6   | 35,0                     | 40,7                                   | 8,5                        | 21,0                     | 31,9                   | 6,1                           |
| Gelderland-Midden         | 32,7        | 13,8  | 5,9                        | 33,4           | 19,4   | 33,2                     | 41,1                                   | 8,9                        | 21,2                     | 34,7                   | 6,9                           |
| Friesland                 | 36,2        | 13,2  | 7,2                        | 36,2           | 21,4   | 32,6                     | 41,9                                   | 8,8                        | 20,4                     | 33,3                   | 4,9                           |
| Flevoland                 | 37,7        | 14,5  | 4,4                        | 32,0           | 17,5   | 40,8                     | 42,5                                   | 9,6                        | 22,8                     | 34,6                   | 7,0                           |
| Drenthe                   | 37,0        | 15,1  | 8,2                        | 35,3           | 22,9   | 32,5                     | 40,1                                   | 8,2                        | 21,2                     | 33,2                   | 4,8                           |
| Brabant-Zuidoost          | 35,0        | 12,0  | 7,7                        | 34,5           | 18,1   | 31,4                     | 42,0                                   | 9,9                        | 24,6                     | 30,9                   | 6,1                           |
| Amsterdam                 | 28,6        | 11,6  | 9,9                        | 30,7           | 25,8   | 31,5                     | 44,5                                   | 8,7                        | 22,1                     | 30,8                   | 6,8                           |

BMI: body mass index. Results based on weighted data.<sup>1</sup>Continuous variable, percentage of respondents scoring 3 or higher (of 11) for the De Jong-Gierveld scale. These respondents experience some degree of loneliness (somewhat, severe or very severe).<sup>2</sup>Continuous variable, percentage of respondents scoring 19 or lower (scale 7-35) for mastery, these respondents experience insufficient mastery.

**Table A6. Prevalence ratios per region for self-rated health being fair or (very) poor, compared to Zuid-Limburg.**

| PR (95%CI)                | Model 1                 | Model 2                 | Model 3a                | Model 3b                | Model 3c                | Model 4                 |
|---------------------------|-------------------------|-------------------------|-------------------------|-------------------------|-------------------------|-------------------------|
| Zuid-Limburg              | 1,00 (ref)              |
| Zuid-Holland-Zuid         | <b>0,75 (0,70-0,80)</b> | <b>0,80 (0,75-0,85)</b> | <b>0,81 (0,76-0,86)</b> | <b>0,83 (0,78-0,88)</b> | <b>0,81 (0,77-0,86)</b> | <b>0,83 (0,79-0,88)</b> |
| Zeeland                   | <b>0,91 (0,85-0,96)</b> | <b>0,94 (0,89-1,00)</b> | <b>1,02 (0,96-1,07)</b> | <b>0,94 (0,89-0,99)</b> | <b>0,94 (0,89-1,00)</b> | 1,00 (0,95-1,05)        |
| Zaanstreek-Waterland      | <b>0,82 (0,78-0,86)</b> | <b>0,85 (0,81-0,89)</b> | <b>0,89 (0,85-0,93)</b> | <b>0,90 (0,86-0,95)</b> | <b>0,89 (0,85-0,94)</b> | <b>0,94 (0,90-0,98)</b> |
| West-Brabant              | <b>0,88 (0,84-0,93)</b> | <b>0,95 (0,90-1,00)</b> | <b>1,00 (0,95-1,05)</b> | <b>0,96 (0,91-1,01)</b> | <b>0,96 (0,91-1,00)</b> | 1,00 (0,95-1,05)        |
| Utrecht                   | <b>0,73 (0,69-0,76)</b> | <b>0,85 (0,82-0,89)</b> | <b>0,90 (0,86-0,93)</b> | <b>0,89 (0,86-0,93)</b> | <b>0,89 (0,86-0,93)</b> | <b>0,94 (0,90-0,98)</b> |
| Twente                    | <b>0,75 (0,71-0,80)</b> | <b>0,81 (0,77-0,86)</b> | <b>0,85 (0,81-0,90)</b> | <b>0,86 (0,81-0,90)</b> | <b>0,84 (0,80-0,89)</b> | <b>0,88 (0,83-0,93)</b> |
| Rotterdam                 | <b>0,93 (0,89-0,97)</b> | <b>0,85 (0,82-0,88)</b> | <b>0,87 (0,83-0,90)</b> | <b>0,89 (0,86-0,93)</b> | <b>0,90 (0,87-0,93)</b> | <b>0,93 (0,89-0,96)</b> |
| Noord- en Oost-Gelderland | <b>0,73 (0,69-0,77)</b> | <b>0,83 (0,79-0,87)</b> | <b>0,87 (0,83-0,92)</b> | <b>0,87 (0,83-0,92)</b> | <b>0,84 (0,81-0,88)</b> | <b>0,89 (0,85-0,93)</b> |
| Limburg-Noord             | <b>0,86 (0,82-0,90)</b> | <b>0,90 (0,86-0,94)</b> | <b>0,95 (0,91-0,99)</b> | <b>0,91 (0,87-0,96)</b> | <b>0,94 (0,90-0,98)</b> | 0,97 (0,93-1,01)        |
| Kennemerland              | <b>0,72 (0,68-0,76)</b> | <b>0,78 (0,74-0,83)</b> | <b>0,83 (0,79-0,88)</b> | <b>0,82 (0,78-0,87)</b> | <b>0,85 (0,81-0,89)</b> | <b>0,90 (0,85-0,94)</b> |
| IJsselland                | <b>0,72 (0,67-0,77)</b> | <b>0,84 (0,78-0,90)</b> | <b>0,89 (0,83-0,95)</b> | <b>0,88 (0,83-0,95)</b> | <b>0,86 (0,80-0,91)</b> | <b>0,91 (0,85-0,97)</b> |
| Hollands Noorden          | <b>0,78 (0,74-0,82)</b> | <b>0,84 (0,80-0,89)</b> | <b>0,90 (0,86-0,95)</b> | <b>0,88 (0,84-0,93)</b> | <b>0,91 (0,86-0,95)</b> | <b>0,95 (0,91-0,99)</b> |
| Hollands Midden           | <b>0,72 (0,68-0,75)</b> | <b>0,82 (0,78-0,86)</b> | <b>0,87 (0,83-0,91)</b> | <b>0,85 (0,82-0,89)</b> | <b>0,81 (0,77-0,84)</b> | <b>0,86 (0,82-0,90)</b> |
| Hart voor Brabant         | <b>0,88 (0,84-0,93)</b> | <b>0,93 (0,89-0,97)</b> | <b>0,98 (0,94-1,02)</b> | <b>0,95 (0,91-0,99)</b> | <b>0,96 (0,92-1,00)</b> | <b>0,92 (0,88-0,96)</b> |
| Haaglanden                | <b>0,84 (0,80-0,88)</b> | <b>0,86 (0,82-0,90)</b> | <b>0,89 (0,85-0,93)</b> | <b>0,89 (0,85-0,93)</b> | <b>0,89 (0,85-0,93)</b> | 1,00 (0,96-1,05)        |
| Groningen                 | <b>0,79 (0,74-0,83)</b> | <b>0,85 (0,81-0,90)</b> | <b>0,88 (0,84-0,93)</b> | <b>0,90 (0,86-0,95)</b> | <b>0,93 (0,89-0,98)</b> | 0,96 (0,92-1,01)        |
| Gooi en Vechtstreek       | <b>0,76 (0,70-0,81)</b> | <b>0,82 (0,77-0,88)</b> | <b>0,88 (0,82-0,94)</b> | <b>0,88 (0,83-0,94)</b> | <b>0,87 (0,82-0,93)</b> | <b>0,94 (0,88-0,99)</b> |
| Gelderland-Zuid           | <b>0,75 (0,71-0,79)</b> | <b>0,85 (0,80-0,89)</b> | <b>0,88 (0,84-0,92)</b> | <b>0,88 (0,84-0,92)</b> | <b>0,87 (0,83-0,91)</b> | <b>0,90 (0,86-0,95)</b> |
| Gelderland-Midden         | <b>0,76 (0,71-0,81)</b> | <b>0,84 (0,79-0,90)</b> | <b>0,88 (0,83-0,94)</b> | <b>0,86 (0,81-0,92)</b> | <b>0,85 (0,80-0,90)</b> | <b>0,89 (0,84-0,94)</b> |
| Friesland                 | <b>0,73 (0,69-0,77)</b> | <b>0,78 (0,74-0,82)</b> | <b>0,82 (0,78-0,87)</b> | <b>0,82 (0,78-0,86)</b> | <b>0,83 (0,79-0,87)</b> | <b>0,86 (0,82-0,91)</b> |
| Flevoland                 | <b>0,81 (0,71-0,92)</b> | <b>0,88 (0,78-0,99)</b> | <b>0,91 (0,81-1,02)</b> | <b>0,91 (0,82-1,02)</b> | <b>0,94 (0,84-1,05)</b> | 0,96 (0,87-1,07)        |
| Drenthe                   | <b>0,76 (0,70-0,82)</b> | <b>0,80 (0,74-0,86)</b> | <b>0,82 (0,76-0,88)</b> | <b>0,84 (0,78-0,90)</b> | <b>0,86 (0,80-0,92)</b> | <b>0,88 (0,82-0,94)</b> |
| Brabant-Zuidoost          | <b>0,88 (0,84-0,92)</b> | <b>0,98 (0,93-1,02)</b> | <b>1,05 (1,00-1,09)</b> | <b>1,00 (0,95-1,04)</b> | <b>0,97 (0,93-1,02)</b> | 1,04 (0,99-1,08)        |
| Amsterdam                 | <b>0,79 (0,74-0,84)</b> | <b>0,77 (0,73-0,82)</b> | <b>0,81 (0,77-0,86)</b> | <b>0,82 (0,78-0,87)</b> | <b>0,85 (0,80-0,89)</b> | <b>0,88 (0,84-0,93)</b> |

PR: prevalence ratio. CI: confidence interval. PR's in bold are significant  $p < 0.05$ . Model 1: region. Model 2: region, demographic factors, and SES. Model 3a: region, demographic factors, SES, and lifestyle. Model 3b: region, demographic factors, SES, and loneliness. Model 3c: region, demographic factors, SES, and mastery. Model 4: region, demographic factors, SES, lifestyle, loneliness, and mastery. Results from robust Poisson regressions ( $n = 334,721$ ), based on weighted data.

**Table A7. Prevalence ratios per region for at least one chronic disease, compared to Zuid-Limburg.**

| PR (95% CI)               | Model 1                 | Model 2                 | Model 3a                | Model 3b                | Model 3c                | Model 4                 |
|---------------------------|-------------------------|-------------------------|-------------------------|-------------------------|-------------------------|-------------------------|
| Zuid-Limburg              | 1,00 (ref)              |
| Zuid-Holland-Zuid         | <b>0,83 (0,78-0,87)</b> | <b>0,86 (0,82-0,91)</b> | <b>0,87 (0,82-0,91)</b> | <b>0,88 (0,83-0,92)</b> | <b>0,87 (0,83-0,91)</b> | <b>0,88 (0,84-0,92)</b> |
| Zeeland                   | <b>0,87 (0,83-0,91)</b> | <b>0,87 (0,83-0,91)</b> | <b>0,90 (0,86-0,94)</b> | <b>0,87 (0,83-0,91)</b> | <b>0,87 (0,83-0,91)</b> | <b>0,89 (0,85-0,93)</b> |
| Zaanstreek-Waterland      | <b>0,93 (0,90-0,97)</b> | <b>0,96 (0,93-1,00)</b> | <b>0,98 (0,94-1,02)</b> | <b>0,99 (0,95-1,03)</b> | <b>0,99 (0,95-1,02)</b> | 1,01 (0,97-1,05)        |
| West-Brabant              | <b>0,81 (0,77-0,84)</b> | <b>0,84 (0,80-0,87)</b> | <b>0,85 (0,82-0,89)</b> | <b>0,84 (0,81-0,88)</b> | <b>0,84 (0,80-0,87)</b> | <b>0,85 (0,82-0,89)</b> |
| Utrecht                   | <b>0,82 (0,79-0,85)</b> | <b>0,91 (0,88-0,94)</b> | <b>0,94 (0,91-0,97)</b> | <b>0,93 (0,90-0,96)</b> | <b>0,93 (0,91-0,96)</b> | <b>0,95 (0,93-0,98)</b> |
| Twente                    | <b>0,89 (0,85-0,94)</b> | <b>0,94 (0,90-0,99)</b> | <b>0,97 (0,93-1,01)</b> | <b>0,97 (0,93-1,01)</b> | <b>0,96 (0,92-1,00)</b> | 0,98 (0,94-1,02)        |
| Rotterdam                 | <b>0,94 (0,91-0,97)</b> | <b>0,94 (0,91-0,98)</b> | <b>0,95 (0,92-0,98)</b> | <b>0,96 (0,93-1,00)</b> | <b>0,97 (0,94-1,00)</b> | 0,98 (0,95-1,01)        |
| Noord- en Oost-Gelderland | <b>0,95 (0,92-0,99)</b> | <b>1,00 (0,97-1,04)</b> | <b>1,02 (0,99-1,06)</b> | <b>1,03 (0,99-1,07)</b> | <b>1,01 (0,97-1,05)</b> | 1,03 (0,99-1,07)        |
| Limburg-Noord             | <b>0,93 (0,89-0,96)</b> | <b>0,94 (0,91-0,98)</b> | <b>0,96 (0,93-1,00)</b> | <b>0,95 (0,92-0,98)</b> | <b>0,96 (0,93-0,99)</b> | 0,97 (0,94-1,01)        |
| Kennemerland              | <b>0,84 (0,80-0,88)</b> | <b>0,88 (0,84-0,92)</b> | <b>0,90 (0,87-0,94)</b> | <b>0,90 (0,87-0,94)</b> | <b>0,92 (0,88-0,95)</b> | <b>0,94 (0,90-0,97)</b> |
| IJsselland                | <b>0,91 (0,87-0,96)</b> | <b>1,00 (0,96-1,05)</b> | <b>1,03 (0,98-1,08)</b> | <b>1,03 (0,98-1,08)</b> | <b>1,01 (0,96-1,05)</b> | 1,03 (0,98-1,08)        |
| Hollands Noorden          | <b>0,87 (0,83-0,91)</b> | <b>0,90 (0,87-0,94)</b> | <b>0,93 (0,90-0,97)</b> | <b>0,92 (0,89-0,96)</b> | <b>0,94 (0,90-0,98)</b> | <b>0,96 (0,92-0,99)</b> |
| Hollands Midden           | <b>0,93 (0,90-0,97)</b> | <b>1,01 (0,97-1,04)</b> | <b>1,03 (1,00-1,07)</b> | <b>1,03 (0,99-1,06)</b> | <b>0,99 (0,96-1,02)</b> | 1,02 (0,98-1,05)        |
| Hart voor Brabant         | <b>0,84 (0,80-0,87)</b> | <b>0,88 (0,85-0,91)</b> | <b>0,90 (0,87-0,94)</b> | <b>0,89 (0,86-0,93)</b> | <b>0,89 (0,86-0,93)</b> | <b>0,91 (0,88-0,94)</b> |
| Haaglanden                | 0,97 (0,93-1,01)        | <b>1,00 (0,97-1,04)</b> | <b>1,02 (0,99-1,06)</b> | <b>1,02 (0,98-1,06)</b> | <b>1,02 (0,99-1,06)</b> | <b>1,04 (1,00-1,08)</b> |
| Groningen                 | <b>0,95 (0,91-0,99)</b> | <b>1,01 (0,97-1,05)</b> | <b>1,03 (0,99-1,07)</b> | <b>1,04 (0,99-1,08)</b> | <b>1,05 (1,01-1,09)</b> | <b>1,06 (1,02-1,11)</b> |
| Gooi en Vechtstreek       | <b>0,85 (0,81-0,90)</b> | <b>0,87 (0,83-0,92)</b> | <b>0,90 (0,86-0,95)</b> | <b>0,90 (0,85-0,95)</b> | <b>0,90 (0,86-0,95)</b> | <b>0,93 (0,89-0,98)</b> |
| Gelderland-Zuid           | <b>0,86 (0,82-0,90)</b> | <b>0,93 (0,89-0,97)</b> | <b>0,94 (0,91-0,98)</b> | <b>0,94 (0,91-0,98)</b> | <b>0,93 (0,90-0,97)</b> | <b>0,95 (0,91-0,99)</b> |
| Gelderland-Midden         | <b>0,93 (0,88-0,98)</b> | <b>0,99 (0,94-1,04)</b> | <b>1,01 (0,96-1,06)</b> | <b>1,00 (0,96-1,05)</b> | <b>0,99 (0,94-1,04)</b> | 1,01 (0,96-1,06)        |
| Friesland                 | <b>0,89 (0,86-0,93)</b> | <b>0,91 (0,88-0,95)</b> | <b>0,93 (0,90-0,97)</b> | <b>0,93 (0,89-0,97)</b> | <b>0,94 (0,90-0,97)</b> | <b>0,95 (0,92-0,99)</b> |
| Flevoland                 | 0,93 (0,85-1,02)        | <b>1,01 (0,92-1,10)</b> | <b>1,02 (0,94-1,11)</b> | <b>1,03 (0,94-1,12)</b> | <b>1,03 (0,95-1,13)</b> | 1,05 (0,96-1,14)        |
| Drenthe                   | <b>0,90 (0,84-0,95)</b> | <b>0,91 (0,86-0,96)</b> | <b>0,92 (0,87-0,97)</b> | <b>0,93 (0,88-0,98)</b> | <b>0,94 (0,89-1,00)</b> | 0,95 (0,90-1,01)        |
| Brabant-Zuidoost          | <b>0,83 (0,80-0,87)</b> | <b>0,87 (0,84-0,91)</b> | <b>0,90 (0,87-0,94)</b> | <b>0,88 (0,85-0,92)</b> | <b>0,87 (0,84-0,91)</b> | <b>0,90 (0,86-0,93)</b> |
| Amsterdam                 | <b>0,83 (0,79-0,87)</b> | <b>0,88 (0,84-0,92)</b> | <b>0,90 (0,86-0,94)</b> | <b>0,90 (0,86-0,94)</b> | <b>0,92 (0,88-0,96)</b> | <b>0,93 (0,89-0,98)</b> |

PR: prevalence ratio. CI: confidence interval. PR's in bold are significant  $p < 0.05$ . Model 1: region. Model 2: region, demographic factors, and SES. Model 3a: region, demographic factors, SES, and lifestyle. Model 3b: region, demographic factors, SES, and loneliness. Model 3c: region, demographic factors, SES, and mastery. Model 4: region, demographic factors, SES, lifestyle, loneliness, and mastery. Results from robust Poisson regressions ( $n = 334,721$ ), based on weighted data.

**Table A8. Odds ratios per region for high risk for psychological distress, compared to Zuid-Limburg.**

| OR (95% CI)               | Model 1                 | Model 2                 | Model 3a                | Model 3b                | Model 3c                | Model 4                 |
|---------------------------|-------------------------|-------------------------|-------------------------|-------------------------|-------------------------|-------------------------|
| Zuid-Limburg              | 1,00 (ref)              |
| Zuid-Holland-Zuid         | <b>0,66 (0,54-0,79)</b> | <b>0,71 (0,58-0,86)</b> | <b>0,72 (0,59-0,88)</b> | <b>0,77 (0,63-0,95)</b> | <b>0,69 (0,54-0,88)</b> | <b>0,76 (0,60-0,96)</b> |
| Zeeland                   | <b>0,70 (0,58-0,84)</b> | <b>0,83 (0,68-1,00)</b> | <b>0,91 (0,75-1,11)</b> | <b>0,81 (0,66-0,99)</b> | <b>0,77 (0,62-0,96)</b> | <b>0,80 (0,64-0,99)</b> |
| Zaanstreek-Waterland      | <b>0,82 (0,72-0,94)</b> | <b>0,86 (0,75-1,00)</b> | <b>0,92 (0,80-1,06)</b> | <b>1,06 (0,91-1,23)</b> | <b>0,97 (0,82-1,15)</b> | 1,09 (0,92-1,30)        |
| West-Brabant              | <b>0,75 (0,65-0,88)</b> | <b>0,89 (0,76-1,04)</b> | <b>0,95 (0,81-1,12)</b> | <b>0,92 (0,78-1,08)</b> | <b>0,92 (0,76-1,12)</b> | 0,96 (0,79-1,16)        |
| Utrecht                   | <b>0,69 (0,61-0,77)</b> | <b>0,77 (0,69-0,87)</b> | <b>0,82 (0,73-0,93)</b> | <b>0,89 (0,79-1,01)</b> | <b>0,87 (0,75-1,00)</b> | 0,94 (0,81-1,09)        |
| Twente                    | 0,96 (0,81-1,14)        | <b>1,08 (0,91-1,28)</b> | <b>1,18 (0,98-1,40)</b> | <b>1,30 (1,08-1,57)</b> | <b>1,31 (1,07-1,60)</b> | <b>1,49 (1,20-1,84)</b> |
| Rotterdam                 | 1,07 (0,96-1,19)        | <b>0,78 (0,69-0,88)</b> | <b>0,80 (0,71-0,90)</b> | <b>0,91 (0,80-1,04)</b> | <b>0,92 (0,80-1,06)</b> | 0,99 (0,86-1,15)        |
| Noord- en Oost-Gelderland | <b>0,71 (0,62-0,81)</b> | <b>0,94 (0,82-1,08)</b> | <b>1,02 (0,88-1,17)</b> | <b>1,04 (0,90-1,21)</b> | <b>0,97 (0,83-1,14)</b> | 1,05 (0,89-1,25)        |
| Limburg-Noord             | <b>0,67 (0,59-0,76)</b> | <b>0,77 (0,67-0,88)</b> | <b>0,81 (0,71-0,93)</b> | <b>0,78 (0,67-0,90)</b> | <b>0,82 (0,70-0,97)</b> | <b>0,84 (0,71-0,99)</b> |
| Kennemerland              | <b>0,68 (0,58-0,79)</b> | <b>0,76 (0,65-0,89)</b> | <b>0,82 (0,70-0,96)</b> | <b>0,87 (0,74-1,03)</b> | <b>0,90 (0,75-1,08)</b> | 1,01 (0,84-1,22)        |
| IJsselland                | <b>0,70 (0,58-0,84)</b> | <b>0,86 (0,71-1,05)</b> | <b>0,94 (0,77-1,14)</b> | <b>1,02 (0,83-1,26)</b> | <b>0,86 (0,69-1,08)</b> | 0,99 (0,79-1,25)        |
| Hollands Noorden          | <b>0,71 (0,61-0,82)</b> | <b>0,78 (0,67-0,91)</b> | <b>0,85 (0,73-0,99)</b> | <b>0,90 (0,77-1,06)</b> | <b>0,86 (0,72-1,03)</b> | 0,95 (0,79-1,14)        |
| Hollands Midden           | <b>0,82 (0,72-0,92)</b> | <b>1,00 (0,88-1,14)</b> | <b>1,09 (0,95-1,24)</b> | <b>1,15 (1,00-1,32)</b> | <b>0,96 (0,82-1,13)</b> | 1,11 (0,94-1,30)        |
| Hart voor Brabant         | <b>0,76 (0,67-0,86)</b> | <b>0,91 (0,80-1,04)</b> | <b>0,98 (0,86-1,12)</b> | <b>0,99 (0,86-1,15)</b> | <b>0,99 (0,84-1,17)</b> | 1,05 (0,89-1,24)        |
| Haaglanden                | <b>1,27 (1,12-1,44)</b> | <b>1,05 (0,92-1,19)</b> | <b>1,10 (0,96-1,26)</b> | <b>1,17 (1,02-1,35)</b> | <b>1,13 (0,96-1,34)</b> | <b>1,22 (1,03-1,44)</b> |
| Groningen                 | <b>0,66 (0,57-0,78)</b> | <b>0,65 (0,55-0,77)</b> | <b>0,69 (0,59-0,82)</b> | <b>0,80 (0,67-0,95)</b> | <b>0,76 (0,62-0,92)</b> | 0,84 (0,69-1,03)        |
| Gooi en Vechtstreek       | <b>0,71 (0,58-0,87)</b> | <b>0,82 (0,66-1,02)</b> | <b>0,88 (0,71-1,09)</b> | <b>0,99 (0,79-1,25)</b> | <b>0,88 (0,69-1,13)</b> | 1,01 (0,78-1,29)        |
| Gelderland-Zuid           | <b>0,86 (0,75-0,98)</b> | <b>0,98 (0,85-1,13)</b> | <b>1,04 (0,90-1,20)</b> | <b>1,13 (0,97-1,32)</b> | <b>1,09 (0,92-1,29)</b> | 1,19 (0,99-1,42)        |
| Gelderland-Midden         | 0,95 (0,78-1,14)        | <b>1,10 (0,91-1,32)</b> | <b>1,16 (0,97-1,40)</b> | <b>1,18 (0,97-1,43)</b> | <b>1,10 (0,89-1,35)</b> | 1,19 (0,97-1,46)        |
| Friesland                 | <b>0,66 (0,57-0,77)</b> | <b>0,75 (0,64-0,88)</b> | <b>0,80 (0,68-0,94)</b> | <b>0,86 (0,73-1,02)</b> | <b>0,86 (0,72-1,03)</b> | 0,95 (0,79-1,14)        |
| Flevoland                 | 1,01 (0,74-1,37)        | <b>0,98 (0,71-1,35)</b> | <b>1,03 (0,74-1,43)</b> | <b>1,12 (0,80-1,55)</b> | <b>1,18 (0,84-1,67)</b> | 1,27 (0,90-1,79)        |
| Drenthe                   | <b>0,65 (0,52-0,80)</b> | <b>0,70 (0,56-0,88)</b> | <b>0,71 (0,57-0,90)</b> | <b>0,79 (0,62-1,02)</b> | <b>0,80 (0,60-1,07)</b> | 0,84 (0,63-1,13)        |
| Brabant-Zuidoost          | <b>0,83 (0,73-0,94)</b> | <b>1,01 (0,88-1,17)</b> | <b>1,12 (0,97-1,29)</b> | <b>1,08 (0,93-1,25)</b> | <b>0,99 (0,84-1,18)</b> | 1,04 (0,87-1,24)        |
| Amsterdam                 | 0,96 (0,84-1,11)        | <b>0,73 (0,62-0,85)</b> | <b>0,77 (0,66-0,90)</b> | <b>0,90 (0,76-1,06)</b> | <b>0,93 (0,78-1,11)</b> | 1,03 (0,86-1,23)        |

PR: prevalence ratio. CI: confidence interval. PR's in bold are significant  $p < 0.05$ . Model 1: region. Model 2: region, demographic factors, and SES. Model 3a: region, demographic factors, SES, and lifestyle. Model 3b: region, demographic factors, SES, and loneliness. Model 3c: region, demographic factors, SES, and mastery. Model 4: region, demographic factors, SES, lifestyle, loneliness, and mastery. Results from robust Poisson regressions ( $n = 334,721$ ), based on weighted data.
